# Supplementary material for: Isolation, Screening, and Identification of Alkaline Protease-Producing Bacteria and Application of the Most Potent Enzyme from Bacillus sp. Mar64
Source: MDPI journal article supplement (doi:10.3390/fermentation9070637), 2023-07-07

**Supplementary Table S1. Sites of protease-producing bacterial isolates in Saudi Arabia screening.**

| Isolate No. | Source        | Isolate No. | Source | Isolate No. | Source | Isolate No. | Source        | Isolate No. | Source      | Isolate No. | Source     | Isolate No. | Source        |
|-------------|---------------|-------------|--------|-------------|--------|-------------|---------------|-------------|-------------|-------------|------------|-------------|---------------|
| 1           | Saihat farm 1 | 21          | Anak   | 41          | Riyadh | 61          | Saihat farm 2 | 81          | Dammam Farm | 101         | Khobar     | 121         | Saihat farm 3 |
| 2           | Saihat farm 1 | 22          | Anak   | 42          | Riyadh | 62          | Saihat farm 2 | 82          | Dammam Farm | 102         | Taif       | 122         | Saihat farm 3 |
| 3           | Saihat farm 1 | 23          | Anak   | 43          | Riyadh | 63          | Saihat farm 2 | 83          | Dammam Farm | 103         | Taif       | 123         | Saihat farm 3 |
| 4           | Saihat farm 1 | 24          | Anak   | 44          | Riyadh | 64          | Saihat farm 2 | 84          | Dammam Farm | 104         | Taif       | 124         | Saihat farm 3 |
| 5           | Saihat farm 1 | 25          | Anak   | 45          | Riyadh | 65          | Saihat farm 2 | 85          | Dammam Farm | 105         | Taif       | 125         | Saihat farm 3 |
| 6           | Saihat farm 1 | 26          | Anak   | 46          | Riyadh | 66          | Saihat farm 2 | 86          | Dammam Farm | 106         | Taif       | 126         | Saihat farm 3 |
| 7           | Saihat farm 1 | 27          | Anak   | 47          | Riyadh | 67          | Saihat farm 2 | 87          | Dammam Farm | 107         | Taif       | 127         | Saihat farm 3 |
| 8           | Saihat farm 1 | 28          | Anak   | 48          | Riyadh | 68          | Saihat farm 2 | 88          | Dammam Farm | 108         | Taif       | 128         | Saihat farm 3 |
| 9           | Saihat farm 1 | 29          | Anak   | 49          | Riyadh | 69          | Saihat farm 2 | 89          | Dammam Farm | 109         | Taif       | 129         | Saihat farm 3 |
| 10          | Saihat farm 1 | 30          | Anak   | 50          | Riyadh | 70          | Saihat farm 2 | 90          | Dammam Farm | 110         | Taif       | 130         | Saihat farm 3 |
| 11          | Jubail        | 31          | Riyadh | 51          | Mecca  | 71          | Saihat farm 2 | 91          | Khobar      | 111         |            |             |               |
| 12          | Jubail        | 32          | Riyadh | 52          | Mecca  | 72          | Saihat farm 2 | 92          | Khobar      | 112         |            |             |               |
| 13          | Jubail        | 33          | Riyadh | 53          | Mecca  | 73          | Saihat farm 2 | 93          | Khobar      | 113         |            |             |               |
| 14          | Jubail        | 34          | Riyadh | 54          | Mecca  | 74          | Saihat farm 2 | 94          | Khobar      | 114         |            |             |               |
| 15          | Jubail        | 35          | Riyadh | 55          | Mecca  | 75          | Saihat farm 2 | 95          | Khobar      | 115         | Taif       |             |               |
| 16          | Jubail        | 36          | Riyadh | 56          | Mecca  | 76          | Dammam Farm   | 96          | Khobar      | 116         | Mecca farm |             |               |
| 17          | Jubail        | 37          | Riyadh | 57          | Mecca  | 77          | Dammam Farm   | 97          | Khobar      | 117         | Mecca farm |             |               |

|    |        |    |        |    |       |    |             |     |        |     |               |  |  |
|----|--------|----|--------|----|-------|----|-------------|-----|--------|-----|---------------|--|--|
| 18 | Jubail | 38 | Riyadh | 58 | Mecca | 78 | Dammam Farm | 98  | Khobar | 118 | Mecca farm    |  |  |
| 19 | Jubail | 39 | Riyadh | 59 | Mecca | 79 | Dammam Farm | 99  | Khobar | 119 | Mecca farm    |  |  |
| 20 | Jubail | 40 | Riyadh | 60 | Mecca | 80 | Dammam Farm | 100 | Khobar | 120 | Saihat farm 3 |  |  |

**Supplementary Table S2. Sites of thirty-seven alkaline protease-producing bacteria in Saudi Arabia.**

| <b>Isolate number</b> | <b>sites</b>  | <b>Soil type</b>    |
|-----------------------|---------------|---------------------|
| 4                     | Saihat farm 1 | Cultivated soil     |
| 9                     | Saihat farm 1 | Cultivated soil     |
| 17                    | Jubail        | Non cultivated soil |
| 24                    | Anak          | Cultivated soil     |
| 27                    | Anak          | Cultivated soil     |
| 31                    | Riyadh        | Non cultivated soil |
| 37                    | Riyadh        | Non cultivated soil |
| 38                    | Riyadh        | Non cultivated soil |
| 39                    | Riyadh        | Non cultivated soil |
| 40                    | Riyadh        | Non cultivated soil |
| 41                    | Riyadh        | Non cultivated soil |
| 49                    | Riyadh        | Non cultivated soil |
| 64                    | Saihat farm 2 | Cultivated soil     |
| 67                    | Saihat farm 2 | Cultivated soil     |
| 68                    | Saihat farm 2 | Cultivated soil     |
| 70                    | Saihat farm 2 | Cultivated soil     |
| 74                    | Saihat farm 2 | Cultivated soil     |
| 75                    | Saihat farm 2 | Cultivated soil     |
| 77                    | Dammam Farm   | Cultivated soil     |
| 80                    | Dammam Farm   | Cultivated soil     |
| 81                    | Dammam Farm   | Cultivated soil     |
| 82                    | Dammam Farm   | Cultivated soil     |
| 84                    | Dammam Farm   | Cultivated soil     |
| 95                    | Khobar        | Garden              |
| 106                   | Taif          | Cultivated soil     |
| 107                   | Taif          | Cultivated soil     |
| 108                   | Taif          | Cultivated soil     |
| 109                   | Taif          | Cultivated soil     |
| 115                   | Taif          | Cultivated soil     |

|     |               |                 |
|-----|---------------|-----------------|
| 116 | Mecca farm    | Cultivated soil |
| 117 | Mecca farm    | Cultivated soil |
| 118 | Mecca farm    | Cultivated soil |
| 119 | Mecca farm    | Cultivated soil |
| 122 | Saihat farm 3 | Cultivated soil |
| 124 | Saihat farm 3 | Cultivated soil |
| 125 | Saihat farm 3 | Cultivated soil |
| 126 | Saihat farm 3 | Cultivated soil |

**Supplementary Table S3.** Estimates of Evolutionary Divergence between Sequences of strain *Bacillus* sp. Mar64 using *16SrDNA* gene and reference sequences using the Maximum Composite Likelihood model through MEGA11.

[illegible]

[illegible]

**Supplementary Figure S1.** Source localities of thirty samples for the protease-producing bacteria (ten sites on the map).

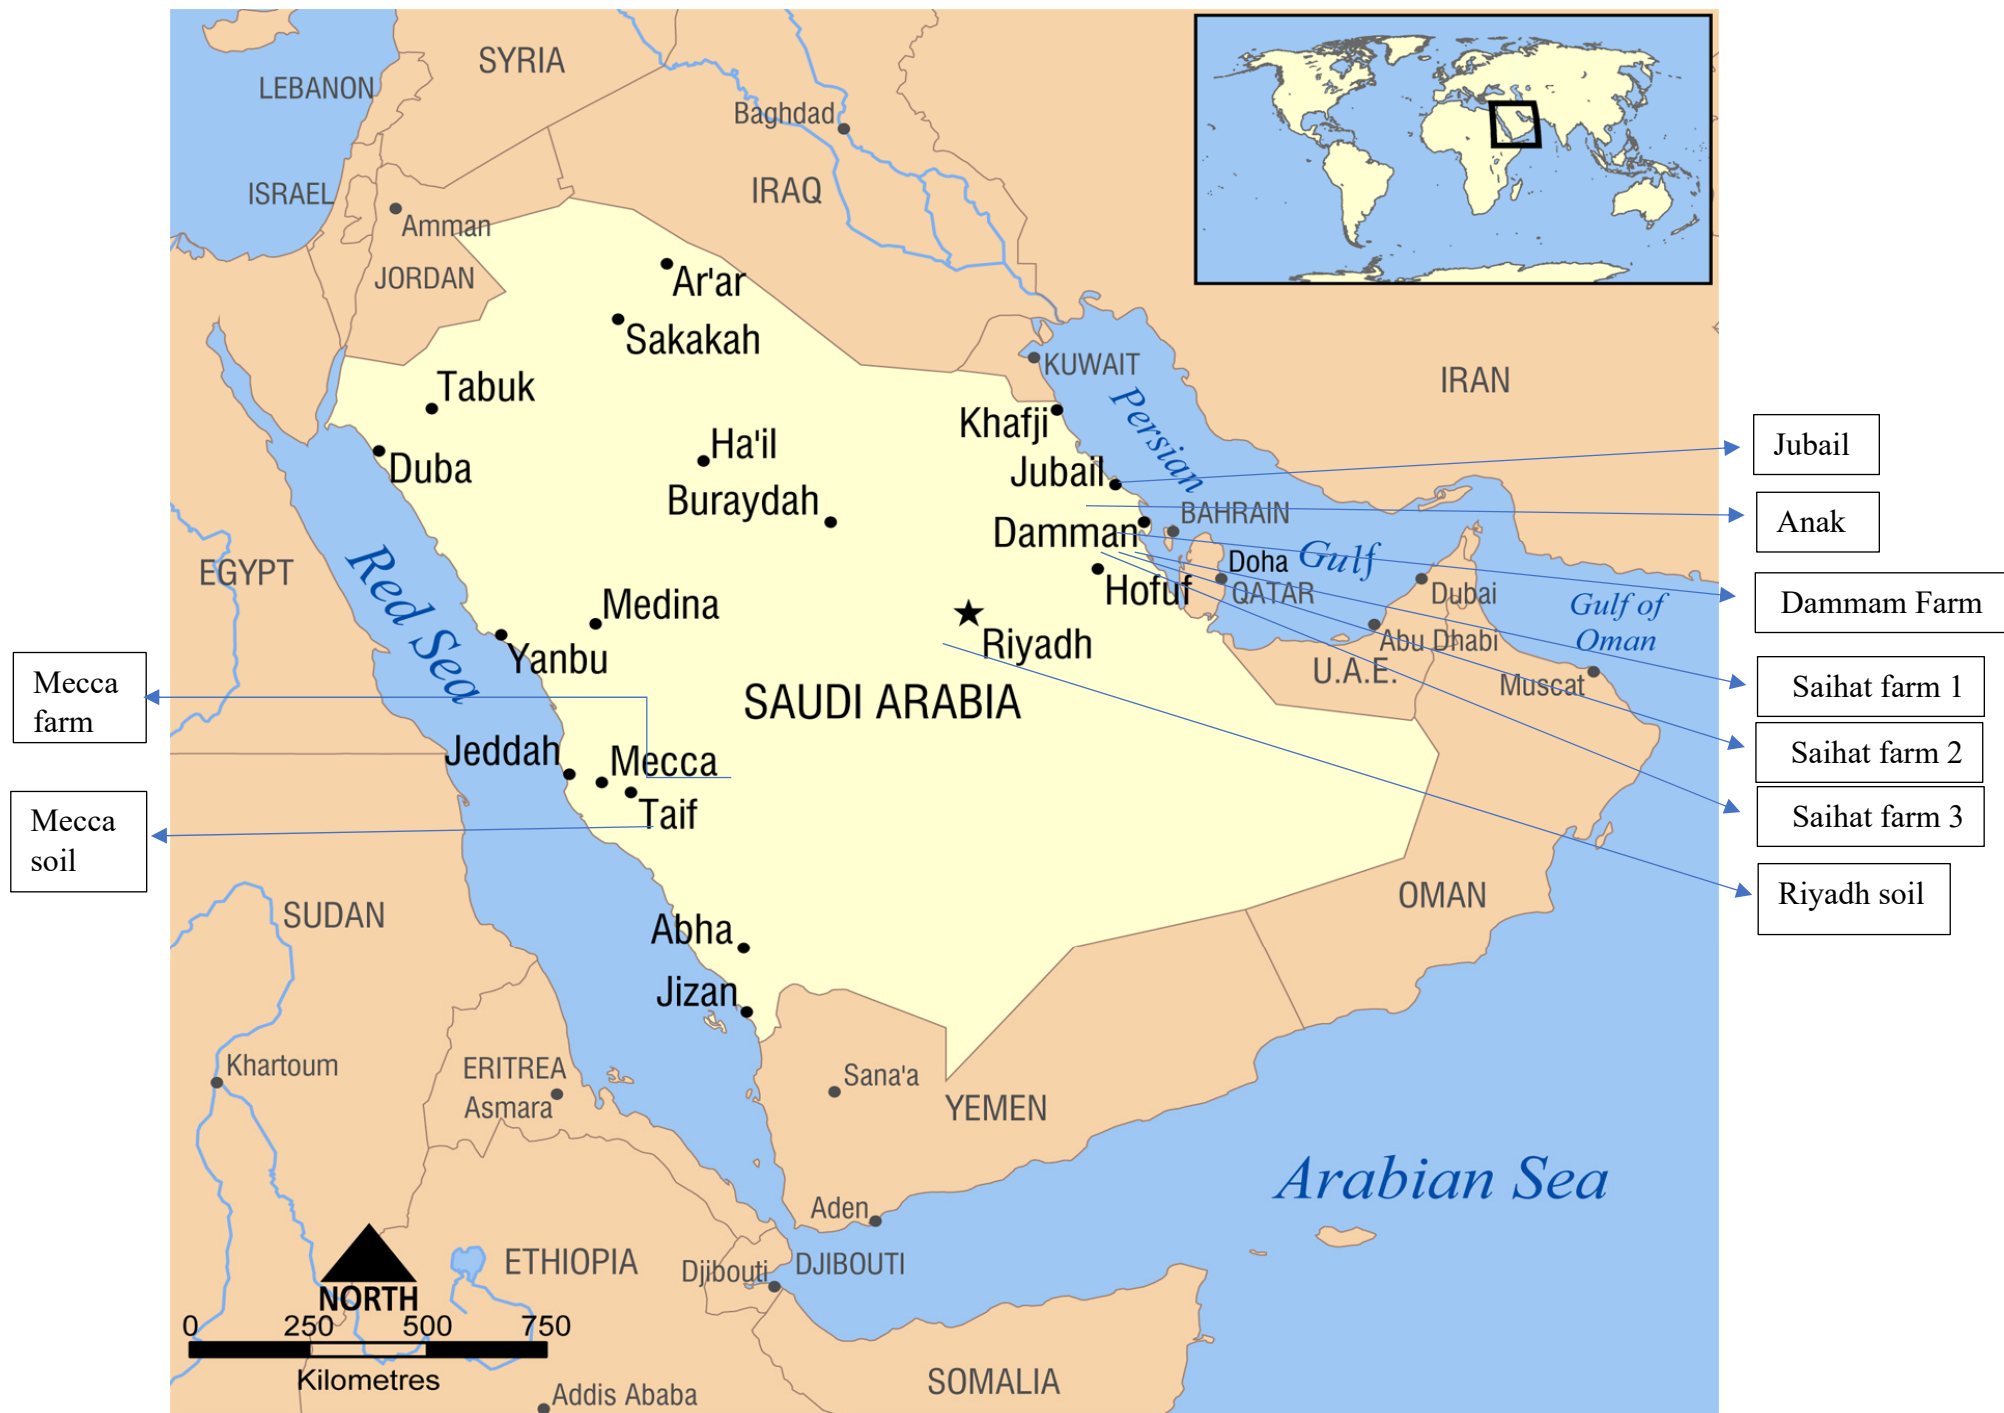

**Supplementary Figure S2.** The geographic coordinates, latitude, and longitude for sources of the most potent alkaline protease-producing bacterial isolates.

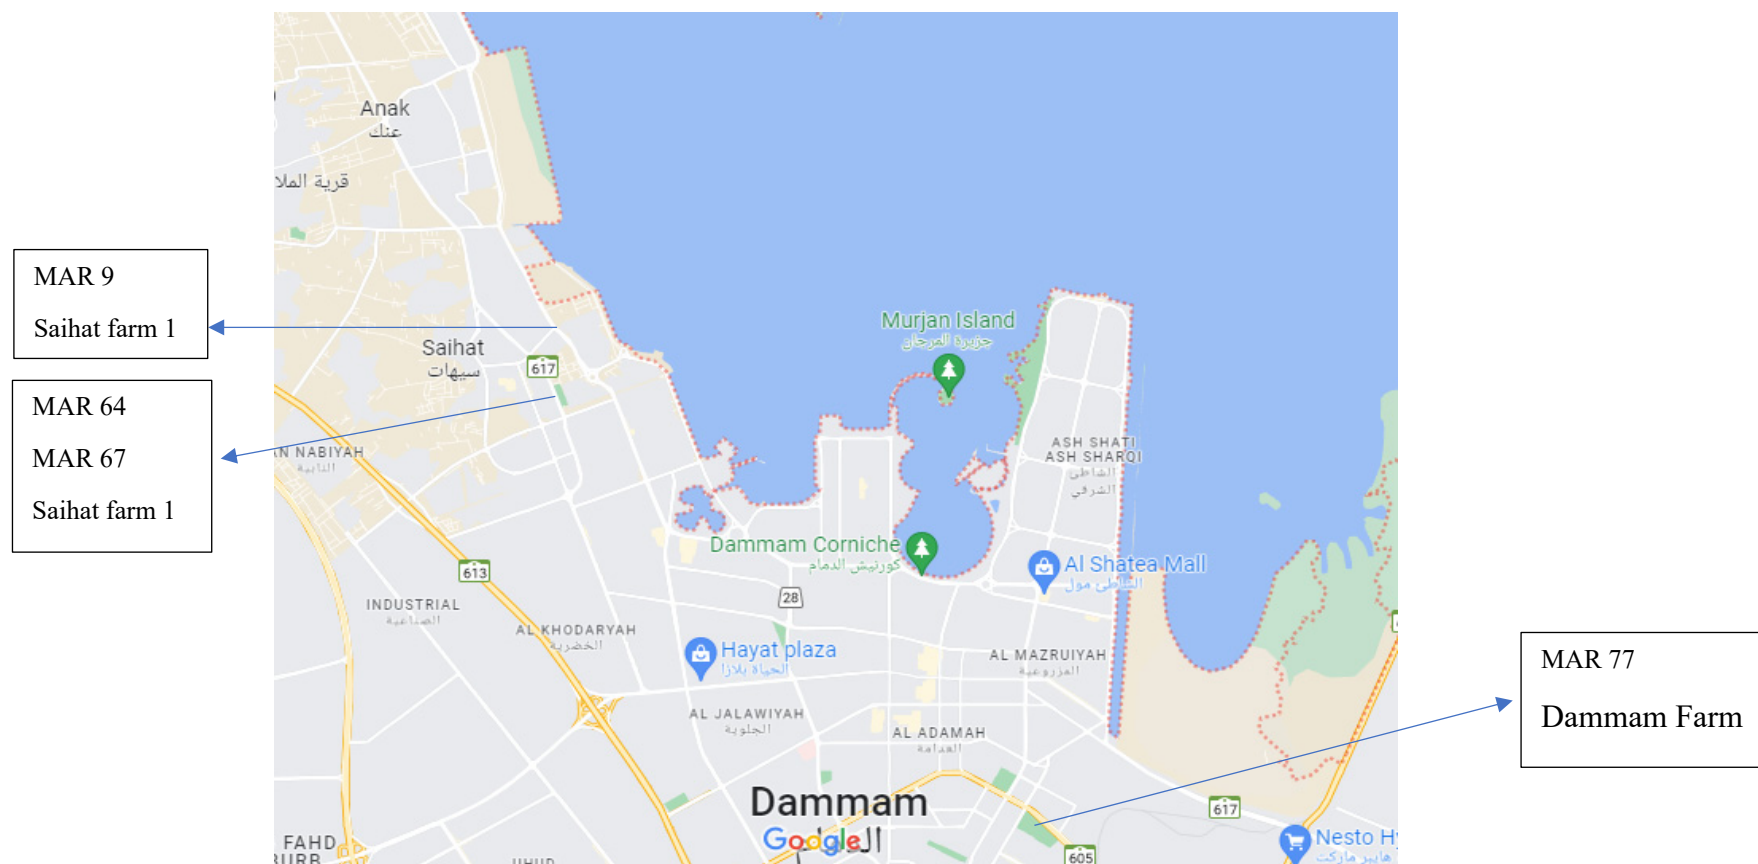

Supplement: s1 [file s1]
